# Supplementary material for: Association between right heart catheterization hemodynamics and glycosylated hemoglobin levels in adults with heart failure with reduced ejection fraction
Source: PubMed Central journal article supplement (PMC10287124; doi:10.1097/xce.0000000000000285), 2023-06-21
Supplement: xce-12-e0285-s001.pdf [file xce-12-e0285-s001.pdf]

Supplementary Material

Supplementary Tables.

Table 1. Demographics by Fick Cardiac Index

|                          | CI Fick <2.2 L/min/m <sup>2</sup> (83) | CI Fick ≥ 2.2 L/min/m <sup>2</sup> (51) | P value |
|--------------------------|----------------------------------------|-----------------------------------------|---------|
| Age (years)              | 54.30                                  | 55.20                                   | 0.74    |
| Gender (%)               | Female                                 | 25.61                                   | 0.79    |
|                          | Male                                   | 74.39                                   |         |
| Ethnicity (%)            | White                                  | 54.32                                   | 0.64    |
|                          | Latino                                 | 20.99                                   |         |
|                          | Afro-American                          | 7.41                                    |         |
|                          | Other                                  | 17.28                                   |         |
| BMI (Kg/m <sup>2</sup> ) | 29.21                                  | 30.98                                   | 0.23    |

Table 2. Demographics by Cardiac Output Fick

|                          | CO Fick <4L/min (59) | CO Fick ≥ 4 L/min (75) | P value |
|--------------------------|----------------------|------------------------|---------|
| Age (years)              | 53.42                | 55.62                  | 0.40    |
| Gender (%)               | Female               | 28.81                  | 0.34    |
|                          | Male                 | 71.19                  |         |
| Ethnicity (%)            | White                | 53.45                  | 0.92    |
|                          | Latino               | 24.14                  |         |
|                          | Afro-American        | 6.90                   |         |
|                          | Other                | 15.52                  |         |
| BMI (Kg/m <sup>2</sup> ) | 28.76                | 30.79                  | 0.16    |

Table 3. Demographics by Cardiac Index Thermodilution

|                          | CI Thermodilution <2.2 L/min/m <sup>2</sup> (64) | CI Thermodilution ≥ 2.2 L/min/m <sup>2</sup> (58) | P value |
|--------------------------|--------------------------------------------------|---------------------------------------------------|---------|
| Age (years)              | 53.78                                            | 52.81                                             | 0.72    |
| Gender (%)               | Female                                           | 30.16                                             | 0.24    |
|                          | Male                                             | 69.84                                             |         |
| Ethnicity (%)            | White                                            | 51.61                                             | 0.38    |
|                          | Latino                                           | 19.35                                             |         |
|                          | Afro-American                                    | 9.68                                              |         |
|                          | Other                                            | 19.35                                             |         |
| BMI (Kg/m <sup>2</sup> ) | 29.27                                            | 30.65                                             | 0.34    |

Table 4. Demographics by Cardiac Output Thermodilution

|                          | CO Thermodilution <4L/min (54) | CO Thermodilution ≥ 4 L/min (68) | P value     |
|--------------------------|--------------------------------|----------------------------------|-------------|
| Age (years)              | 54.87                          | 52.10                            | 0.31        |
| Gender (%)               | Female                         | 33.96                            | 0.06        |
|                          | Male                           | 66.04                            |             |
| Ethnicity (%)            | White                          | 55.77                            | 0.16        |
|                          | Latino                         | 17.31                            |             |
|                          | Afro-American                  | 5.77                             |             |
|                          | Other                          | 21.15                            |             |
| BMI (Kg/m <sup>2</sup> ) | 27.91                          | 31.50                            | <b>0.01</b> |

Table 5. Demographics by Right Atrial Pressure.

|                          | RAP ≤6 mmHg (49) | RAP >6 mmHg (86) | P value     |
|--------------------------|------------------|------------------|-------------|
| Age (years)              | 57.76            | 52.67            | 0.06        |
| Gender (%)               | Female           | 16.33            | 0.07        |
|                          | Male             | 83.67            |             |
| Ethnicity (%)            | White            | 45.83            | 0.81        |
|                          | Latino           | 29.17            |             |
|                          | Afro-American    | 8.33             |             |
|                          | Other            | 16.67            |             |
| BMI (Kg/m <sup>2</sup> ) | 27.73            | 30.94            | <b>0.01</b> |

Table 6. Demographics by Right Ventricular Systolic Pressure

|                          |               | RVSP $\leq$ 25 mmHg (15) | RVSP >25 mmHg (117) | P value*     |
|--------------------------|---------------|--------------------------|---------------------|--------------|
| Age (years)              |               | 48.27                    | 55.30               | 0.09         |
| Gender (%)               | Female        | 33.33                    | 24.14               | 0.44         |
|                          | Male          | 66.67                    | 75.86               |              |
| Ethnicity (%)            | White         | 20.00                    | 53.91               | <b>0.009</b> |
|                          | Latino        | 26.67                    | 25.22               |              |
|                          | Afro-American | 6.67                     | 7.83                |              |
|                          | Other         | 46.67                    | 13.04               |              |
| BMI (Kg/m <sup>2</sup> ) |               | 27.29                    | 30.20               | <b>0.02</b>  |

Table 7. Demographics by Right Ventricular Diastolic Pressure

|                          |               | RVDP $\leq$ 8mmHg (108) | RVDP >8 mmHg (24) | P value* |
|--------------------------|---------------|-------------------------|-------------------|----------|
| Age (years)              |               | 55.27                   | 51.04             | 0.22     |
| Gender (%)               | Female        | 24.30                   | 29.17             | 0.62     |
|                          | Male          | 75.70                   | 70.83             |          |
| Ethnicity (%)            | White         | 49.06                   | 54.17             | 0.86     |
|                          | Latino        | 24.53                   | 29.17             |          |
|                          | Afro-American | 8.49                    | 4.17              |          |
|                          | Other         | 17.92                   | 12.50             |          |
| BMI (Kg/m <sup>2</sup> ) |               | 29.86                   | 29.87             | 0.99     |

Table 8. Demographics by Pulmonary Artery Systolic Pressure

|                          |               | PASP $\leq$ 25 mmHg (10) | PASP >25 mmHg (121) | P value* |
|--------------------------|---------------|--------------------------|---------------------|----------|
| Age (years)              |               | 51.18                    | 54.75               | 0.45     |
| Gender (%)               | Female        | 27.27                    | 25.00               | 1.00     |
|                          | Male          | 72.73                    | 75.00               |          |
| Ethnicity (%)            | White         | 11.11                    | 52.07               | 0.05     |
|                          | Latino        | 44.44                    | 24.79               |          |
|                          | Afro-American | 0.00                     | 8.26                |          |
|                          | Other         | 44.44                    | 14.88               |          |
| BMI (Kg/m <sup>2</sup> ) |               | 27.67                    | 30.10               | 0.34     |

Table 9. Demographics by Pulmonary Artery Diastolic Pressure

|                          |               | PADP $\leq$ 15 mmHg (55) | PADP >15 mmHg (82) | P value |
|--------------------------|---------------|--------------------------|--------------------|---------|
| Age (years)              |               | 56.05                    | 53.49              | 0.33    |
| Gender (%)               | Female        | 27.27                    | 23.43              | 0.61    |
|                          | Male          | 72.73                    | 76.54              |         |
| Ethnicity (%)            | White         | 44.44                    | 54.32              | 0.73    |
|                          | Latino        | 27.78                    | 22.22              |         |
|                          | Afro-American | 9.26                     | 7.41               |         |
|                          | Other         | 18.52                    | 16.05              |         |
| BMI (Kg/m <sup>2</sup> ) |               | 29.40                    | 30.20              | 0.57    |

Table 10. Demographics by Mean Pulmonary Artery Pressure

|               |               | MPAP $\leq$ 19 mmHg (36) | MPAP >20 mmHg (101) | P value |
|---------------|---------------|--------------------------|---------------------|---------|
| Age (years)   |               | 55.11                    | 54.32               | 0.79    |
| Gender (%)    | Female        | 27.78                    | 24.00               | 0.65    |
|               | Male          | 72.22                    | 76.00               |         |
| Ethnicity (%) | White         | 37.14                    | 55.00               | 0.22    |
|               | Latino        | 25.71                    | 24.00               |         |
|               | Afro-American | 11.43                    | 7.00                |         |

|             |       |       |       |      |
|-------------|-------|-------|-------|------|
|             | Other | 25.71 | 14.00 |      |
| BMI (Kg/m2) |       | 27.94 | 30.57 | 0.09 |

Table 11. Demographics by Pulmonary Artery Wedge Pressure.

|               |               | PAWP $\leq$ 15 mmHg (51) | PAWP >15 mmHg (84) | P value |
|---------------|---------------|--------------------------|--------------------|---------|
| Age (years)   |               | 54.63                    | 53.86              | 0.77    |
| Gender (%)    | Female        | 23.53                    | 26.51              | 0.70    |
|               | Male          | 76.47                    | 73.49              |         |
| Ethnicity (%) | White         | 52.00                    | 48.19              | 0.76    |
|               | Latino        | 20.00                    | 27.71              |         |
|               | Afro-American | 10.00                    | 7.23               |         |
|               | Other         | 18.00                    | 16.87              |         |
| BMI (Kg/m2)   |               | 28.75                    | 30.43              | 0.23    |

\*P value obtained from Exact Fisher's Test
